# Supplementary figures and images for: Natural variation in SAR11 marine bacterioplankton genomes inferred from metagenomic data
Source: Springer Nature journal article supplement (doi:10.1186/1745-6150-2-27), 2007-11-07

Pelagibacter syntenic fragment plot showing fragments carrying at least 3 genes.

**
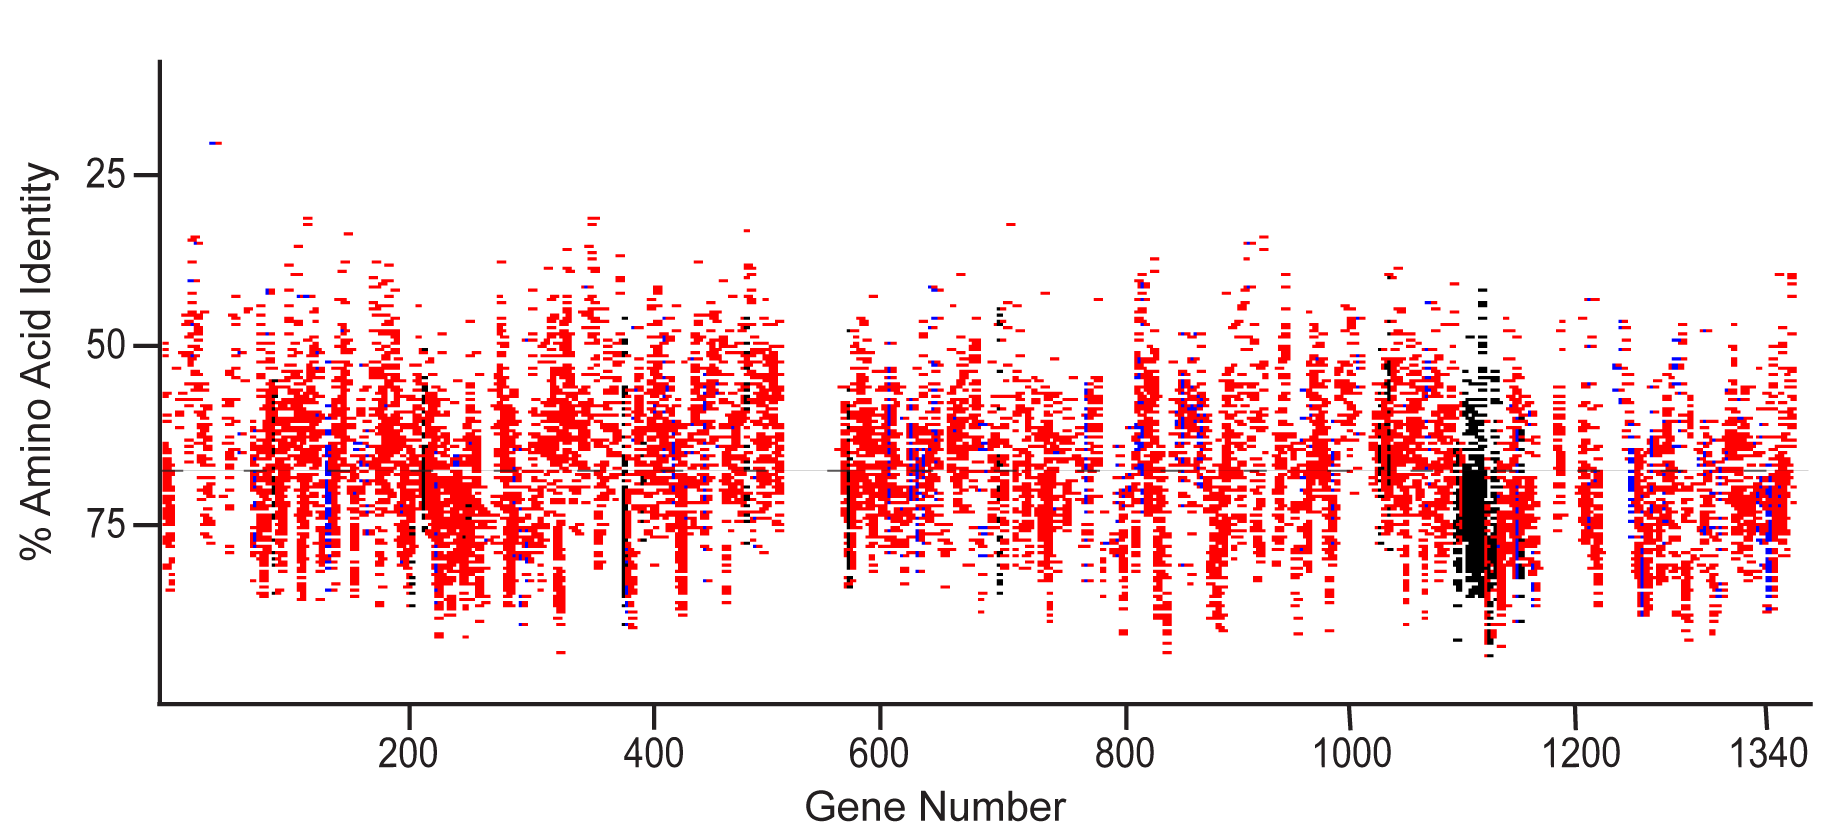
**

Supplement: Additional file 5 [file 1745-6150-2-27-s5.doc]

**Analysis of assemblies versus unassembled reads.**

**
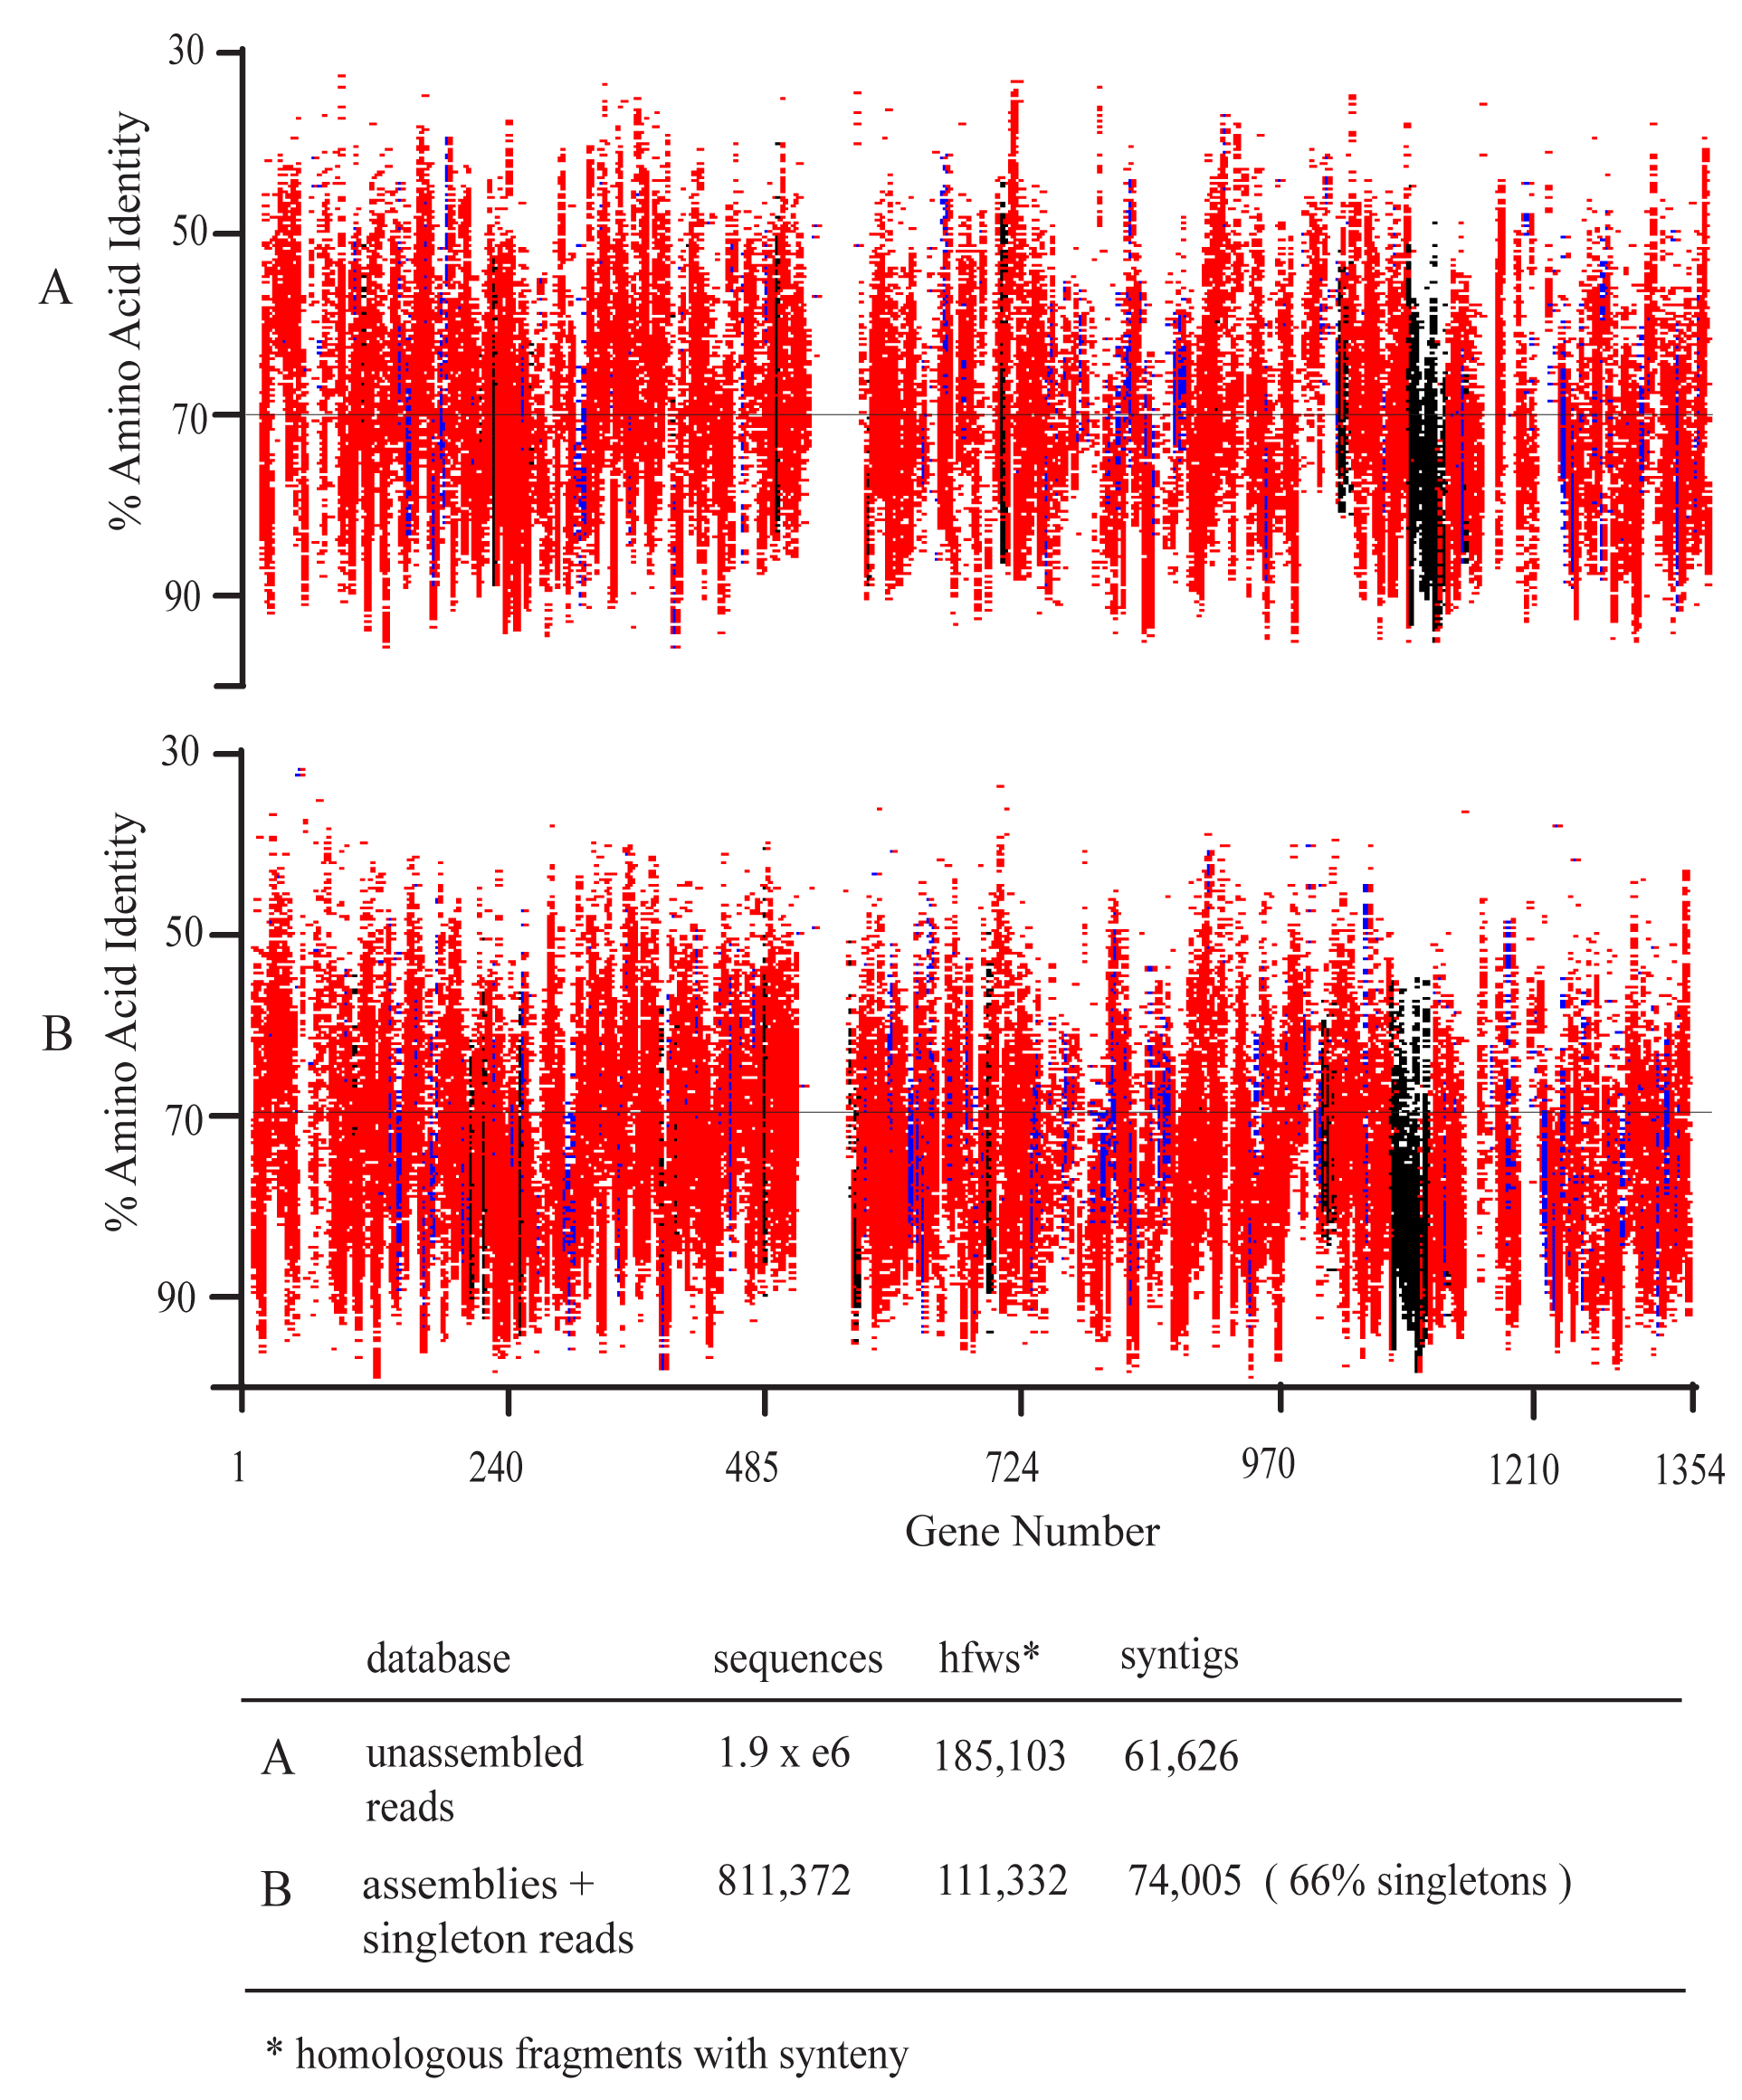
**

Supplement: Additional file 6 [file 1745-6150-2-27-s6.doc]
